# Supplementary material for: Genetic structure and geneflow of Crowned Bullfrogs (Hoplobatrachus occipitalis) across ecological zones in Southwestern Nigeria
Source: Research Square preprint supplement (doi:10.21203/rs.3.rs-8663849/v1), 2026-02-18
Supplement: Supplementary file 1 [file d06d8c6f977109f187bc32b0.docx]

Supplementary Table 1 (S1) List of Samples used for the 16S and ddRADseq analyses. Including, field numbers, vegetation zone, Country of origin, region and geographic details. “Region” describes the part of Africa as follows: West (West Africa); East (East Africa); Central (Central Africa).

| **Field No** | **mtDNA** | **ddRADSeq*** | **Vegetation Zone** | **Country** | **Region** | **Latitude** | **Longitude** |
| --- | --- | --- | --- | --- | --- | --- | --- |
| HAD2 |  | HOOC0078 | Derived  Savanna | Nigeria | West | 5.216556 | 7.5990833 |
| HAD3 |  | N/A | Derived  Savanna | Nigeria | West | 5.216556 | 7.5990833 |
| HSK3 |  | HOOC0055 | Derived  Savanna | Nigeria | West | 3.746056 | 7.8995 |
| HSK6 |  | HOOC0079 | Derived  Savanna | Nigeria | West | 3.746056 | 7.8995 |
| HAD5 |  | HOOC0007 | Derived  savanna | Nigeria | West | 5.216556 | 7.5990833 |
| HSK9 |  | HOOC0008 | Derived  savanna | Nigeria | West | 3.746056 | 7.8995 |
| HSK10 |  | HOOC0016 | Derived  savanna | Nigeria | West | 3.746056 | 7.8995 |
| HAD8 |  | HOOC0031 | Derived  savanna | Nigeria | West | 5.216556 | 7.5990833 |
| HSK4 |  | HOOC0063 | Derived  savanna | Nigeria | West | 3.746056 | 7.8995 |
| HAD1 |  | HOOC0070 | Derived  savanna | Nigeria | West | 5.216556 | 7.5990833 |
| HSK5 |  | HOOC0071 | Derived  savanna | Nigeria | West | 3.746056 | 7.8995 |
| HAD4 |  | HOOC0094 | Derived  savanna | Nigeria | West | 5.216556 | 7.5990833 |
| HSK8 |  | HOOC0095 | Derived  savanna | Nigeria | West | 3.746056 | 7.8995 |
| HIG4 |  | HOOC0048 | Guinea  Savanna | Nigeria | West | 4.154806 | 8.7288611 |
| HIG5 |  | N/A | Guinea  Savanna | Nigeria | West | 4.154806 | 8.7288611 |
| HIG2 |  | HOOC0032 | Guinea  savanna | Nigeria | West | 4.154806 | 8.7288611 |
| HIG6 |  | HOOC0064 | Guinea  savanna | Nigeria | West | 4.154806 | 8.7288611 |
| HIG7 |  | HOOC0072 | Guinea  savanna | Nigeria | West | 4.154806 | 8.7288611 |
| HIG8 |  | HOOC0080 | Guinea  savanna | Nigeria | West | 4.154806 | 8.7288611 |
| HIG10 |  | HOOC0096 | Guinea  savanna | Nigeria | West | 4.154806 | 8.7288611 |
| HBG4 |  | HOOC0025 | Mangrove  Forest | Nigeria | West | 3.003333 | 6.4675556 |
| HBG9 |  | HOOC0065 | Mangrove  Forest | Nigeria | West | 3.003333 | 6.4675556 |
| HEP2 |  | HOOC0066 | Mangrove  Forest | Nigeria | West | 3.9785 | 6.5788333 |
| HEP4 |  | HOOC0082 | Mangrove  Forest | Nigeria | West | 3.9785 | 6.5788333 |
| HIK5 |  | HOOC0010 | Mangrove  Forest | Nigeria | West | 3.487278 | 6.62775 |
| HIK7 |  | HOOC0026 | Mangrove  Forest | Nigeria | West | 3.487278 | 6.62775 |
| HBG1 |  | HOOC0001 | Mangrove  Forest | Nigeria | West | 3.003333 | 6.4675556 |
| HIK3 |  | HOOC0002 | Mangrove  Forest | Nigeria | West | 3.487278 | 6.62775 |
| HEP6 |  | HOOC0003 | Mangrove  Forest | Nigeria | West | 3.9785 | 6.5788333 |
| HBG2 |  | HOOC0009 | Mangrove  Forest | Nigeria | West | 3.003333 | 6.4675556 |
| HEP7 |  | HOOC0011 | Mangrove  Forest | Nigeria | West | 3.9785 | 6.5788333 |
| HBG3 |  | HOOC0017 | Mangrove  Forest | Nigeria | West | 3.003333 | 6.4675556 |
| HIK6 |  | HOOC0018 | Mangrove  Forest | Nigeria | West | 3.487278 | 6.62775 |
| HEP8 |  | HOOC0019 | Mangrove  Forest | Nigeria | West | 3.9785 | 6.5788333 |
| HEP9 |  | HOOC0027 | Mangrove  Forest | Nigeria | West | 3.9785 | 6.5788333 |
| HBG5 |  | HOOC0033 | Mangrove  Forest | Nigeria | West | 3.003333 | 6.4675556 |
| HIK8 |  | HOOC0034 | Mangrove  Forest | Nigeria | West | 3.487278 | 6.62775 |
| HEP10 |  | HOOC0035 | Mangrove  Forest | Nigeria | West | 3.9785 | 6.5788333 |
| HBG6 |  | HOOC0041 | Mangrove  Forest | Nigeria | West | 3.003333 | 6.4675556 |
| HIK9 |  | HOOC0042 | Mangrove  Forest | Nigeria | West | 3.487278 | 6.62775 |
| HBG7 |  | HOOC0049 | Mangrove  Forest | Nigeria | West | 3.003333 | 6.4675556 |
| HlK10 |  | HOOC0050 | Mangrove  Forest | Nigeria | West | 3.487278 | 6.62775 |
| HEP1 |  | HOOC0058 | Mangrove  Forest | Nigeria | West | 3.9785 | 6.5788333 |
| HBG10 |  | HOOC0073 | Mangrove  Forest | Nigeria | West | 3.003333 | 6.4675556 |
| HEP3 |  | HOOC0074 | Mangrove  Forest | Nigeria | West | 3.9785 | 6.5788333 |
| HIK1 |  | HOOC0081 | Mangrove  Forest | Nigeria | West | 3.487278 | 6.62775 |
| HIF2 |  | HOOC0013 | Rainforest | Nigeria | West | 4.696333 | 7.2026389 |
| HIF6 |  | HOOC0045 | Rainforest | Nigeria | West | 4.696333 | 7.2026389 |
| HAB1 |  | HOOC0020 | Rainforest | Nigeria | West | 3.326139 | 7.1574722 |
| HAB2 |  | HOOC0028 | Rainforest | Nigeria | West | 3.326139 | 7.1574722 |
| HIB7 |  | N/A | Rainforest | Nigeria | West | 3.899639 | 7.4418056 |
| HIB9 |  | HOOC0004 | Rainforest | Nigeria | West | 3.899639 | 7.4418056 |
| HIB10 |  | HOOC0012 | Rainforest | Nigeria | West | 3.899639 | 7.4418056 |
| HAB3 |  | HOOC0036 | Rainforest | Nigeria | West | 3.326139 | 7.1574722 |
| HIF5 |  | HOOC0037 | Rainforest | Nigeria | West | 4.696333 | 7.2026389 |
| HIB1 |  | HOOC0043 | Rainforest | Nigeria | West | 3.899639 | 7.4418056 |
| HAB4 |  | HOOC0044 | Rainforest | Nigeria | West | 3.326139 | 7.1574722 |
| HIB2 |  | HOOC0051 | Rainforest | Nigeria | West | 3.899639 | 7.4418056 |
| HAB5 |  | HOOC0052 | Rainforest | Nigeria | West | 3.326139 | 7.1574722 |
| HIB3 |  | HOOC0059 | Rainforest | Nigeria | West | 3.899639 | 7.4418056 |
| HAB6 |  | HOOC0060 | Rainforest | Nigeria | West | 3.326139 | 7.1574722 |
| HIF8 |  | HOOC0061 | Rainforest | Nigeria | West | 4.696333 | 7.2026389 |
| HIB4 |  | HOOC0067 | Rainforest | Nigeria | West | 3.899639 | 7.4418056 |
| HAB7 |  | HOOC0068 | Rainforest | Nigeria | West | 3.326139 | 7.1574722 |
| HIF9 |  | HOOC0069 | Rainforest | Nigeria | West | 4.696333 | 7.2026389 |
| HIB5 |  | HOOC0075 | Rainforest | Nigeria | West | 3.899639 | 7.4418056 |
| HAB8 |  | HOOC0076 | Rainforest | Nigeria | West | 3.326139 | 7.1574722 |
| HIF10 |  | HOOC0077 | Rainforest | Nigeria | West | 4.696333 | 7.2026389 |
| HIB6 |  | HOOC0083 | Rainforest | Nigeria | West | 3.899639 | 7.4418056 |
| HAB10 |  | HOOC0092 | Rainforest | Nigeria | West | 3.326139 | 7.1574722 |
|  | AB272599 | N/A | N/A | Tanzania | East | −3.83 | 32.59 |
|  | AB272600 | N/A | N/A | Tanzania | East | −3.83 | 32.59 |
|  | AY014373 | N/A | N/A | Mauritania | West | |  |
|  | AY014374 | N/A | N/A | Uganda | East | 1.3 | 32.5 |
|  | DQ283059 | N/A | N/A | Ghana | West | 5.354 | −0.703 |
|  | EU979845 | N/A | N/A | Mauritania | West | 20.253 | −13.088 |
|  | GQ183571 | N/A | N/A | Dem.  Rep. Congo | Central | 0.39 | 29.87 |
|  | KF991268 | N/A | N/A | Guinea | West | 10.9 | −10.9 |
|  | KY080125 | N/A | N/A | Gabon | Central | −2.784 | 10.106 |
|  | KY080126 | N/A | N/A | Gabon | Central | −3.083 | 10.437 |
|  | KY080127 | N/A | N/A | Rep.  Congo | Central | 1.088 | 17.307 |
|  | KY080128 | N/A | N/A | Rep.  Congo | Central | 1.088 | 17.307 |
|  | KY080129 | N/A | N/A | Rep.  Congo | Central | −4.45 | 14.77 |
|  | KY080130 | N/A | N/A | Rep.  Congo | Central | −2.667 | 13.596 |
|  | KY080131 | N/A | N/A | Gabon | Central | −2.748 | 10.001 |
|  | KY080132 | N/A | N/A | Rep.  Congo | Central | −4.45 | 14.77 |
|  | KY080133 | N/A | N/A | Rep.  Congo | Central | −4.45 | 14.77 |
|  | KY080134 | N/A | N/A | Gabon | Central | −2.730 | 9.974 |
|  | KY080135 | N/A | N/A | Rep.  Congo | Central | 1.088 | 17.307 |
|  | KY080136 | N/A | N/A | Gabon | Central | −2.743 | 9.994 |
|  | KY080137 | N/A | N/A | Rep.  Congo | Central | 1.088 | 17.307 |
|  | KY080138 | N/A | N/A | Gabon | Central | −3.027 | 10.375 |
|  | MK036437 | N/A | N/A | Angola | Central | |  |
|  | MK036438 | N/A | N/A | Angola | Central | |  |
|  | MK036439 | N/A | N/A | Angola | Central | |  |
|  | MK036495 | N/A | N/A | Angola | Central | |  |
|  | MK864111 | N/A | N/A | Mauritania | West | 16.142 | −13.477 |
|  | MK864123 | N/A | N/A | Mauritania | West | 15.322 | −12.842 |
|  | MK864124 | N/A | N/A | Mauritania | West | 15.996 | −12.723 |
|  | MK864169 | N/A | N/A | Mauritania | West | 15.289 | −12.536 |
|  | MK864185 | N/A | N/A | Niger | West | 13.966 | 9.281 |

* ddRADSeq samples that were removed for low sequencing depth are not included in this table (HOOC0024, HOOC0039, HOOC0047).
